# Supplementary figures and images for: Rapid Removal of Acid Red 88 by Zeolite/Chitosan Hydrogel in Aqueous Solution
Source: MDPI journal article supplement (doi:10.3390/polym14050893), 2022-02-24

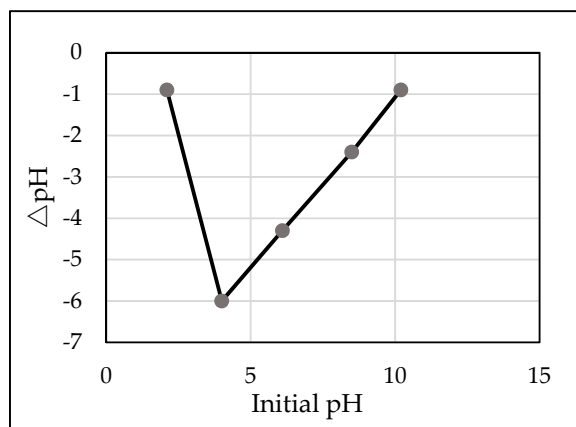

(a)

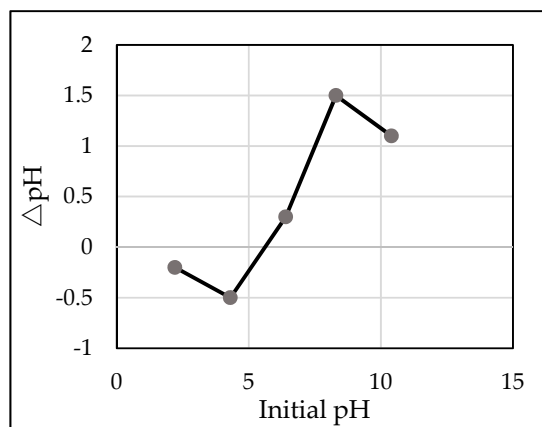

(b)

**Figure S1.** pH zero point charge ( $\text{pH}_{\text{zpc}}$ ). **(a)** ZL-CH hydrogel (1% acetic acid); **(b)** zeolite.

Supplement: s1 [file s1]
